# Supplementary material for: Electrochemical synthesis of hydroxyl group-functionalized PProDOT/ZnO for an ultraviolet photodetector
Source: Royal Society of Chemistry journal article supplement (doi:10.1039/d1ra01962g), 2021-01-01
Supplement: d1ra01962g1.pdf [file d1ra01962g1.pdf]

## Electrochemical synthesis of hydroxyl group-functionalized

## PProDOT/ZnO for a ultraviolet photodetector†

Zulpikar Helil<sup>a</sup>, Tursun Abdiryim<sup>a\*</sup>, Ruxangul Jamal<sup>b</sup>, Aysel Kadir<sup>b</sup>, Yuzhu Che<sup>a</sup>, Dongna Zou<sup>a</sup>, Mariyam Niyaz<sup>a</sup>

<sup>a</sup>Key Laboratory of Energy Materials Chemistry, Ministry of Education; Key Laboratory of Advanced Functional Materials, Autonomous Region; Institute of Applied Chemistry, College of Chemistry, Xinjiang University, Urumqi, 830046,

<sup>b</sup>Key Laboratory of Oil and Gas Fine Chemicals, Ministry of Education & Xinjiang Uygur Autonomous Region, Xinjiang University, Urumqi, 830046 P.R. China

\* Corresponding author

E-mail: [tursunabdir@sina.com.cn](mailto:tursunabdir@sina.com.cn)

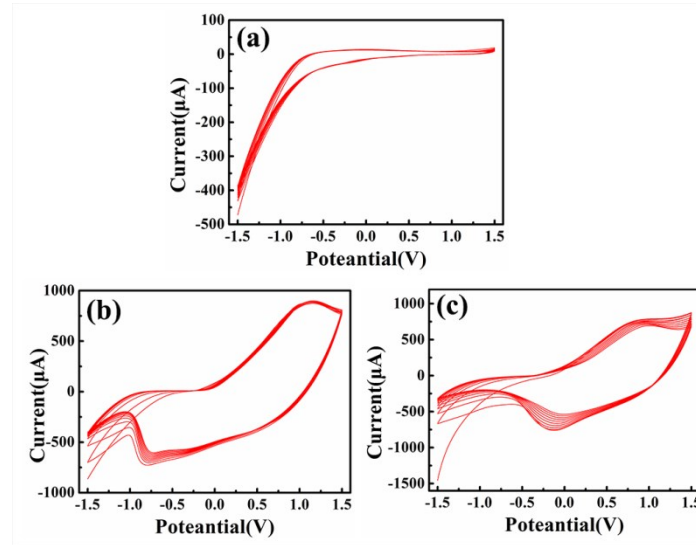

Fig S1 Cyclic voltammograms of (a) ZnO (b) ZnO/PProDOT, (c) ZnO/PProDOT-OH composites in an electrolyte of 0.05 M tetra-n-butylammonium hexafluorophosphate TBAPF<sub>6</sub> in dichloromethane solution at 100 mV/s sweep rate.

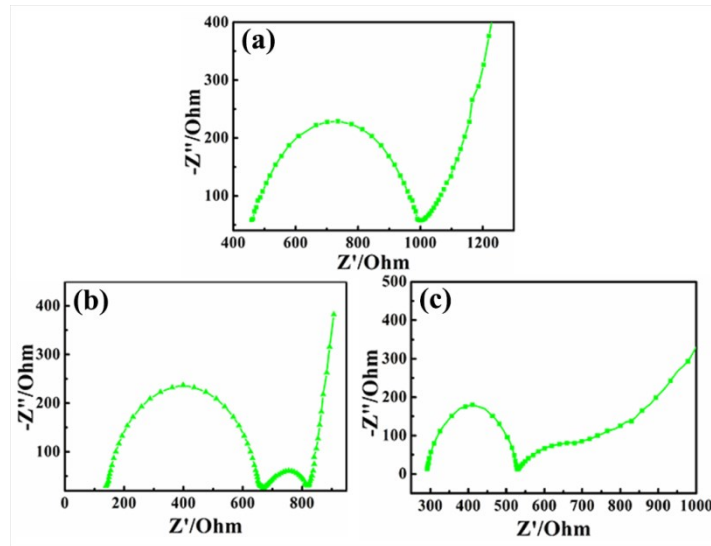

Fig S2 EIS spectra of (a) ZnO (b) ZnO/PProDOT, (c) ZnO/PProDOT-OH composites in an electrolyte of 0.05M tetra-n-butylammonium hexafluorophosphate TBAPF<sub>6</sub> in dichloromethane solution .

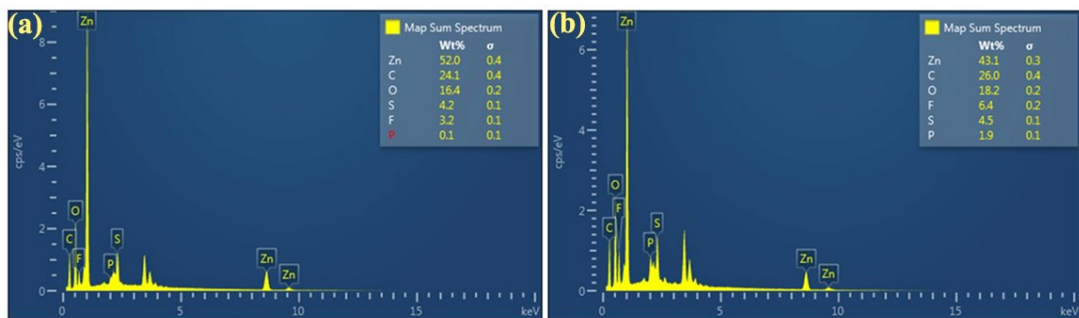

Fig S3 EDS of (a) ZnO/PProDOT, (b) ZnO/ProDOT-OH composites.
